# Supplementary material
Source: PubMed Central journal article supplement (PMC4361365)
Supplement: Supp_Data.pdf [file Supp_Data.pdf]

## Supplementary Data

### Supplementary Materials and Methods

#### Production and purification of mouse *Srx* and *Prx1*

Recombinant *M. musculus* *Srx* was obtained by cloning a synthetic ORF coding mouse *Srx* optimized for expression in *Escherichia coli* (GeneArt; Life Technologies, Carlsbad, CA) into a modified pGEX-6P-1 plasmid (GE Healthcare Bio-Sciences, Piscataway, NJ), enabling production of an N-terminal 6xHis/GST fusion protein. Recombinant His-tagged mouse *Prx1* was obtained by cloning a synthetic ORF coding mouse *Prx1* optimized for expression in *E. coli* (GeneArt; Life Technologies) into the pET28b(+) plasmid (source) between the *Nde*I and *Sac*I sites. The C41(DE3) [*F*<sup>-</sup> *ompT* *hsdS*<sub>B</sub> (*r*<sub>B</sub><sup>-</sup> *m*<sub>B</sub><sup>-</sup>) *gal dcm* (DE3)] *E. coli* strain was used for production of mouse *Srx* and *Prx1*.

For protein purification, cells were harvested by centrifugation, resuspended in a minimal volume of buffer (50 mM potassium phosphate buffer, 50 mM imidazole, 0.5 M KCl, pH7) and sonicated. The fusion His tagged proteins contained in the soluble fraction were purified on an Ni-Sepharose column that was connected to an AKTA FPLC system (GE Healthcare Bio-Sciences), and eluted by a 0.5 M imidazole step. For mouse *Srx*, the HT-GST tag was cleaved by the PreScission protease (GE Healthcare Bio-Sciences) overnight at 4°C, before final purification by gel filtration on a superdex 75 column. Both purified proteins were stored at -20°C, in the presence of 15% glycerol and 10 mM DTT. Molecular concentrations were determined spectrophotometrically, using theoretical extinction coefficients at 280 nm of 13,400 M<sup>-1</sup>.cm<sup>-1</sup> for mouse *Srx* and 20,065 M<sup>-1</sup>.cm<sup>-1</sup> for mouse *Prx1*.

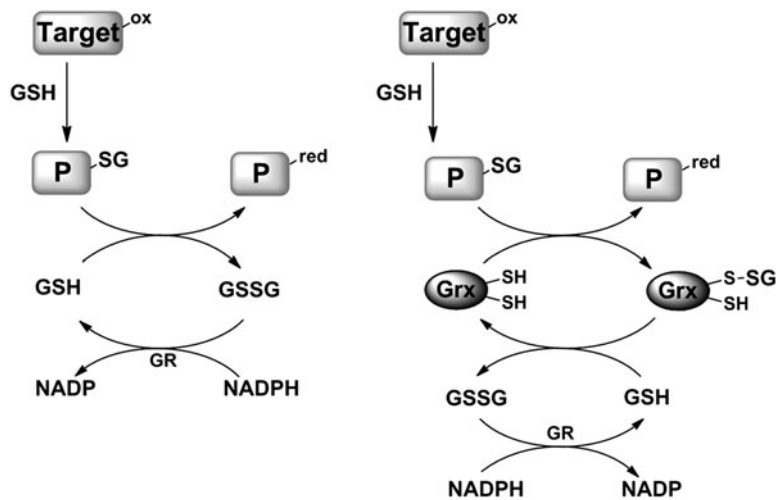

**SUPPLEMENTARY FIG. S1. Schematic principle of the GSH/GR (left) and GSH/Grx/GR (right) coupled assays.** The oxidized target is reduced by a molecule of GSH, which results in formation of a glutathionylated protein (P). The glutathionyl moiety is then transferred to a second GSH molecule either directly (left) or via Grx (right). The oxidized glutathione GSSG produced is reduced to GSH by GR coupled to NADPH oxidation. GR: glutathione reductase.

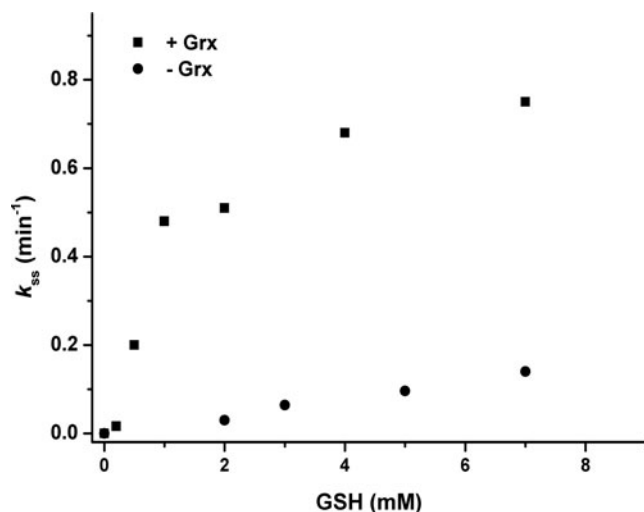

**SUPPLEMENTARY FIG. S2. Steady-state kinetics of SrxC<sup>84</sup> using wild-type Prx-SO<sub>2</sub> substrate, recycled by the GSH/Grx/GR system.** The reaction of 25  $\mu$ M Prx-SO<sub>2</sub> with 10  $\mu$ M SrxC<sup>84</sup> in the presence of 1 mM MgCl<sub>2</sub> was followed using the GSH/GR (0.5  $\mu$ M GR and 200  $\mu$ M NADPH, *circles*), GSH/Grx/GR (50  $\mu$ M Grx, 0.5  $\mu$ M GR, and 200  $\mu$ M NADPH, *squares*) coupled assay. The assay was initiated by the addition of 1 mM ATP. Initial rate measurements were carried out at 30°C in buffer TK by following the decrease in absorbance at 340 nm due to the oxidation of NADPH. The lower maximum rate constant of 0.8 versus 1.2 min<sup>-1</sup> obtained for C171A Prx-SO<sub>2</sub> is due to the use of a Prx-SO<sub>2</sub> concentration of 25  $\mu$ M, which is slightly sub-saturating relative to SrxC<sup>84</sup>.

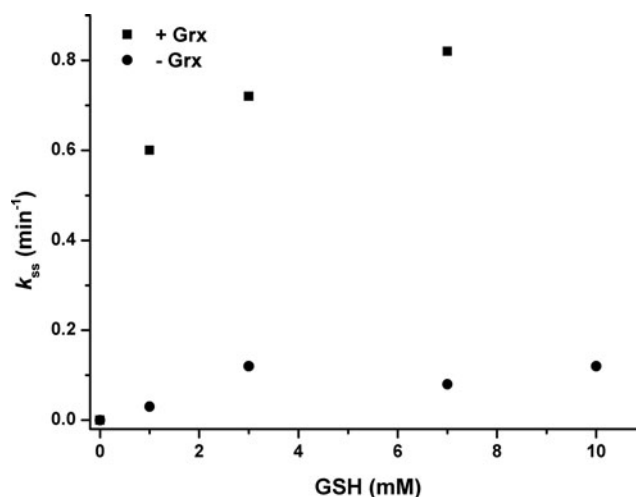

**SUPPLEMENTARY FIG. S3. Mouse SrxC<sup>84</sup> is recycled by the GSH/Grx/GR system in the steady state.** The reaction of 50  $\mu$ M mouse hyperoxidized Prx1 with 10  $\mu$ M mouse SrxC<sup>84</sup> in the presence of 1 mM MgCl<sub>2</sub> was followed using the GSH/GR (0.5  $\mu$ M GR and 200  $\mu$ M NADPH, *circles*), or GSH/Grx/GR (50  $\mu$ M *E. coli* Grx, 0.5  $\mu$ M GR, and 200  $\mu$ M NADPH, *squares*) coupled assays. The assay was started by addition of 1 mM ATP. Initial rate measurements were carried out at 30°C in buffer TK by following the decrease in absorbance at 340 nm due to the oxidation of NADPH.

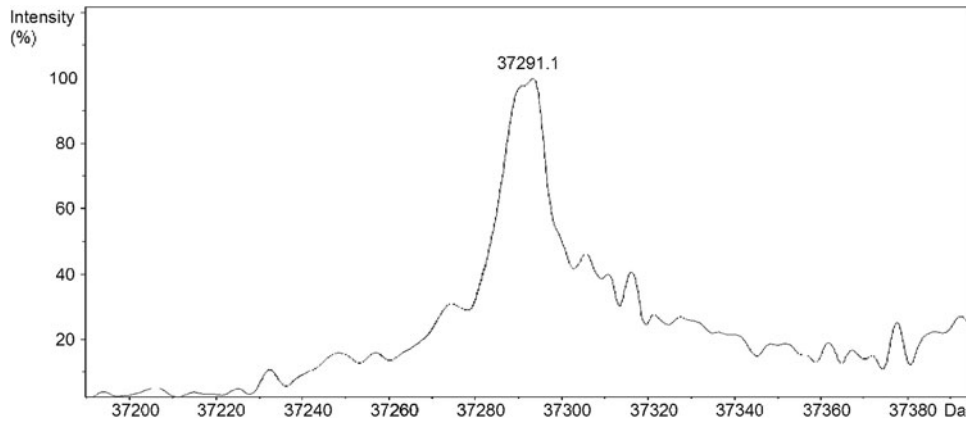

**SUPPLEMENTARY FIG. S4. Mass spectrometry analysis of the Prx-Srx complex used in Figure 5A.** Deconvoluted mass spectrum of the species eluting in peak **c** (Fig. 4A) after 1 min of incubation of equimolar concentrations ( $30 \mu\text{M}$ ) of C171A Prx-SO<sub>2</sub> and Srx C84A-C106V (equivalent to Srx<sup>C84</sup>) in the presence of 1 mM ATP and MgCl<sub>2</sub>, in buffer TK at 30°C. Expected mass for the Prx-SO-S-Srx species: 37290.5 Da.

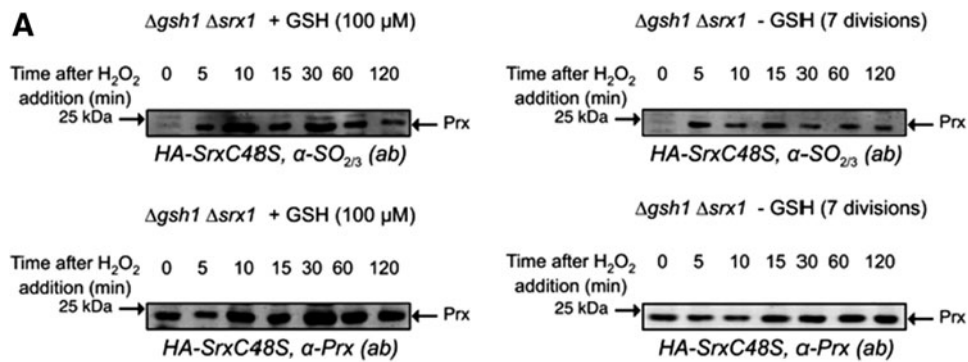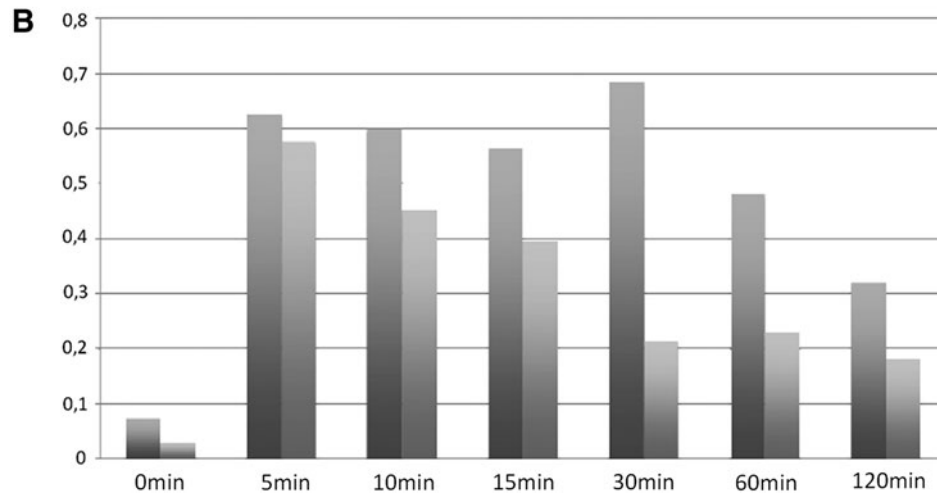

**SUPPLEMENTARY FIG. S5. Impact of GSH on the kinetics of Prx-SO<sub>2</sub> reduction *in vivo*.** (A) Cultures of *Δgsh1 Δsrx1* carrying pRS316-HA2-SrxC48S, grown in selective minimal medium (SD URA<sup>-</sup>) supplemented with 100  $\mu\text{M}$  GSH (*left panels*), or grown for seven divisions in selective minimal medium (SD URA<sup>-</sup>) lacking GSH (*right panels*), were exposed during 30 min of 100  $\mu\text{M}$  H<sub>2</sub>O<sub>2</sub> to induce *SRX1* expression. After 30 min, cells were exposed again to 500  $\mu\text{M}$  H<sub>2</sub>O<sub>2</sub> and lysed after 5, 10, 15, 30, 60, and 120 min by the TCA protocol. Normalized total protein extracts were immunoblotted with anti-Prx-SO<sub>2/3</sub> or anti-Prx (anti Tsa1) antibodies, after separation by reducing 15% SDS-PAGE. (B) The band intensities corresponding to Prx-SO<sub>2</sub> were normalized relative to total Prx, for cells grown in the presence (*light gray*) or absence (*dark gray*) of GSH.

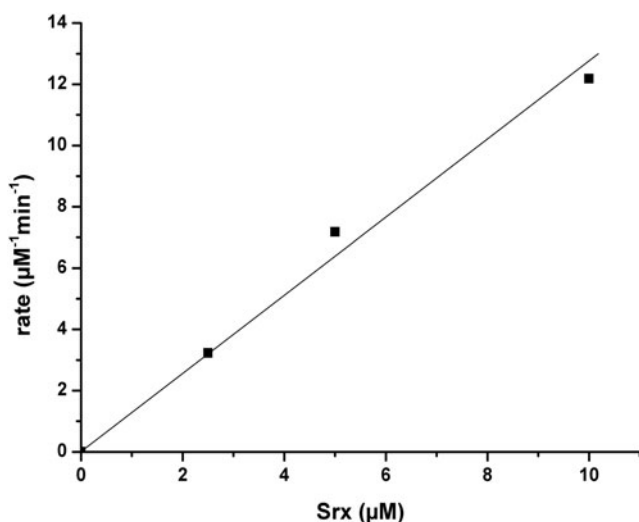

**SUPPLEMENTARY FIG. S6. The rate of the Srx-catalyzed reaction in steady state is proportional to Srx.** The reaction of  $50 \mu\text{M}$  Prx-SO<sub>2</sub> with 0, 2.5, 5, and  $10 \mu\text{M}$  Srx<sup>C84</sup> in the presence of  $1 \text{ mM}$  MgCl<sub>2</sub> was followed using the GSH/Grx/GR ( $50 \mu\text{M}$  Grx,  $0.5 \mu\text{M}$  GR, and  $200 \mu\text{M}$  NADPH, *squares*) coupled assay in the presence of  $1 \text{ mM}$  GSH. The assay was started by the addition of  $1 \text{ mM}$  ATP. Initial rate measurements were carried out at  $30^\circ\text{C}$  in buffer TK by following the decrease in absorbance at  $340 \text{ nm}$  due to the oxidation of NADPH. The slope of the line corresponds to a steady-state rate constant  $k_{ss}$  of  $1.2 \text{ min}^{-1}$ .

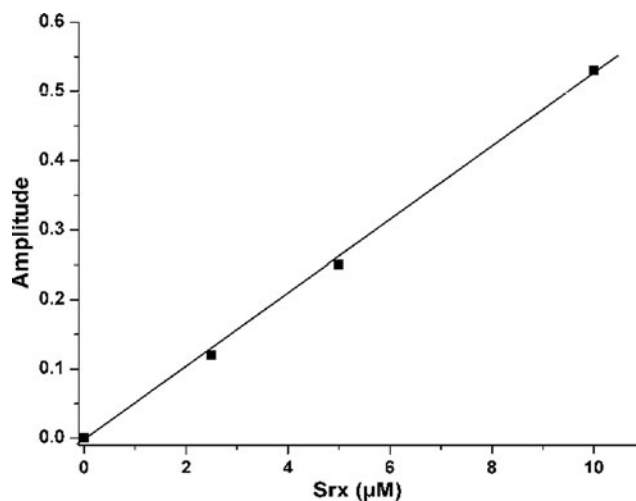

**SUPPLEMENTARY FIG. S7. Impact of Srx concentration on the kinetics of Srx reduction by GSH under single-turnover conditions.** Final concentrations of  $40 \mu\text{M}$  Prx-SO<sub>2</sub>,  $1 \text{ mM}$  ATP,  $1 \text{ mM}$  MgCl<sub>2</sub>, and  $1 \text{ mM}$  GSH were rapidly mixed with 0, 2.5, 5, and  $10 \mu\text{M}$  Srx<sup>C84</sup> in buffer TK at  $30^\circ\text{C}$  in a rapid kinetics spectrofluorometer. Quenching of fluorescence emission intensity of wild-type Prx on going from the oxidized Prx-SO<sub>2</sub> to the disulfide form was recorded on an SX18MV-R stopped-flow apparatus fitted for fluorescence measurements, with excitation wavelength set at  $295 \text{ nm}$ , and emitted light collected above  $320 \text{ nm}$  using a cutoff filter. The blank-corrected progress curves were analyzed using a first-order kinetic model to deduce the amplitudes (*squares*) of the process.
